# Supplementary material for: The temperature of emotions
Source: PubMed Central journal article supplement (PMC8174739; doi:10.1371/journal.pone.0252408), 2021-06-03
Supplement: pone.0252408.s001.pdf [file pone.0252408.s001.pdf]

**S1 Table. Number of participants per first language and country of residence in Experiment 1**

|                | English | Spanish | Japanese | Chinese |
|----------------|---------|---------|----------|---------|
| Argentina      | -       | 4       | -        | -       |
| Australia      | 1       | -       | 1        | 2       |
| Belgium        | -       | -       | -        | 1       |
| Bolivia        | -       | 2       | -        | -       |
| Canada         | 1       | -       | -        | 12      |
| Chile          | -       | 5       | -        | -       |
| China          | -       | -       | -        | 20      |
| Colombia       | -       | 7       | -        | -       |
| Costa Rica     | -       | 14      | -        | -       |
| Denmark        | -       | 2       | -        | 7       |
| Estonia        | -       | -       | -        | 1       |
| France         | -       | -       | 1        | -       |
| Germany        | -       | -       | 1        | 1       |
| Guatemala      | -       | 1       | -        | -       |
| Honduras       | -       | 1       | -        | -       |
| Ireland        | -       | -       | 1        | -       |
| Italy          | -       | 1       | -        | -       |
| Japan          | -       | -       | 63       | -       |
| Mexico         | -       | 37      | -        | -       |
| New Zealand    | 2       | -       | 2        | 1       |
| Norway         | -       | 4       | -        | 3       |
| Peru           | -       | 1       | -        | -       |
| Spain          | -       | 8       | -        | 1       |
| Switzerland    | -       | -       | -        | 2       |
| Taiwan         | -       | -       | -        | 1       |
| United Kingdom | 49      | 3       | 6        | 17      |
| United States  | 101     | 4       | 4        | 7       |
| Total          | 154     | 94      | 79       | 76      |

**S1 Fig. Emotion adjectives in the four languages used in Experiment 1**

A) English

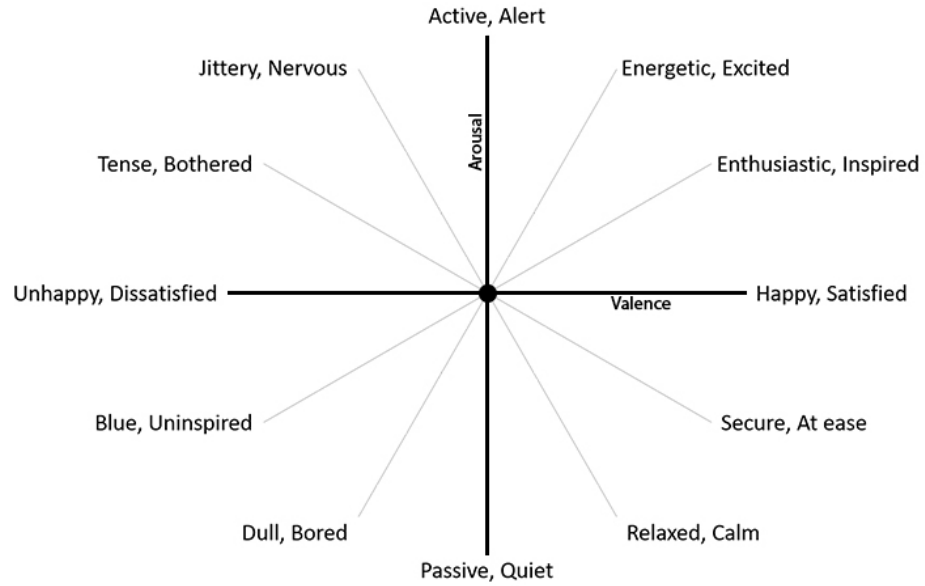

B) Spanish

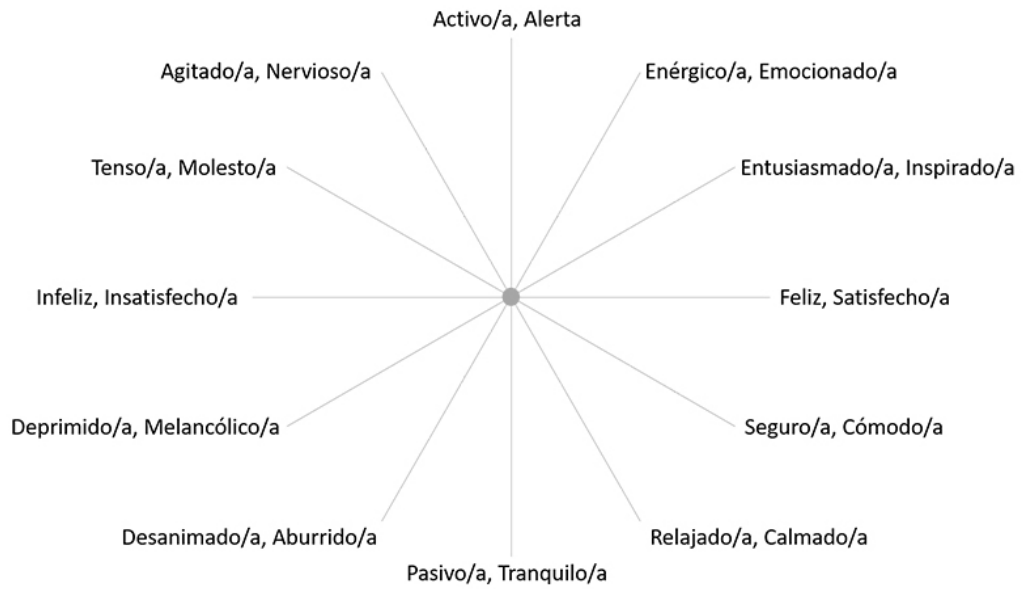

C) Japanese

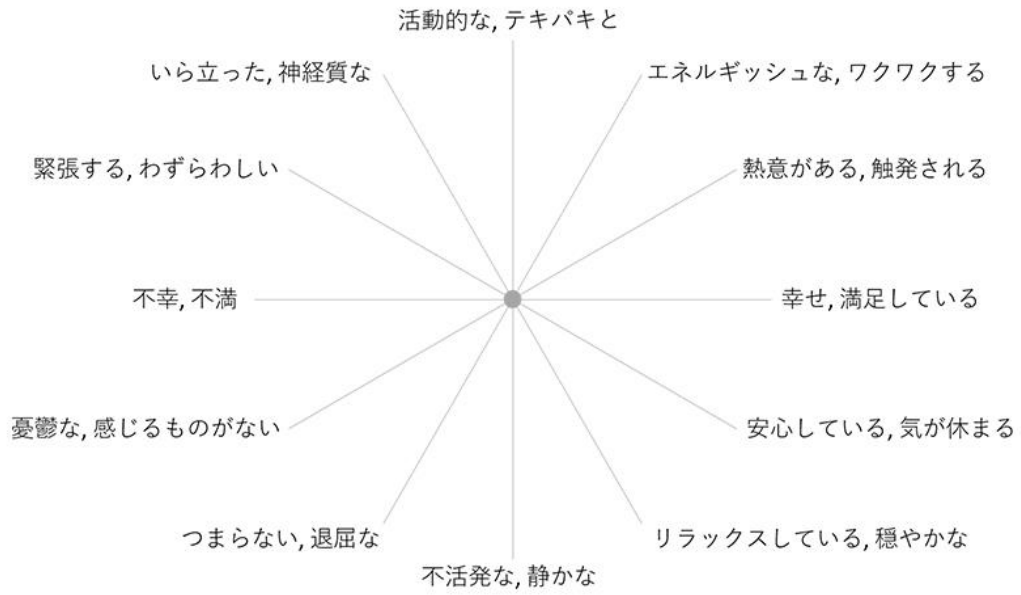

D) Chinese

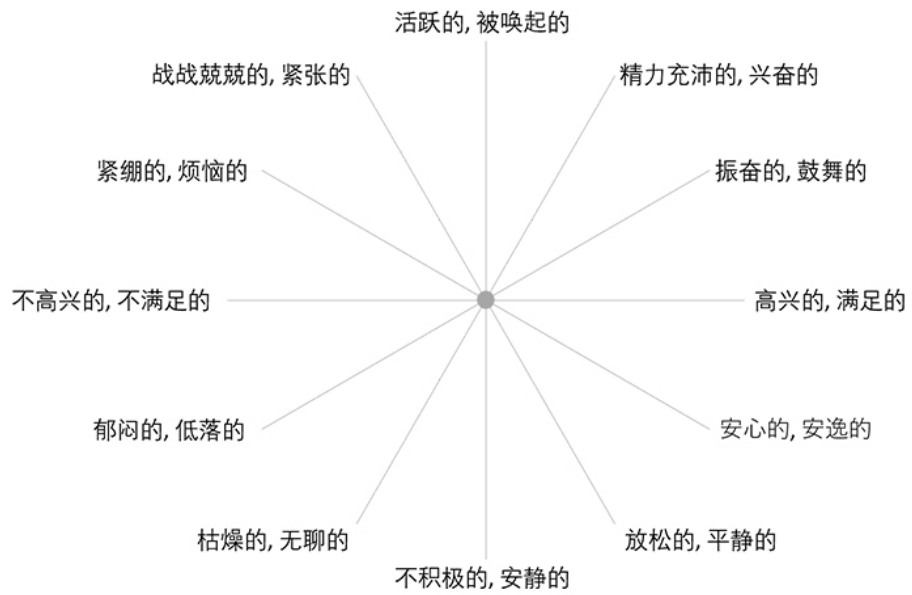

**S2 Table. Varimax-rotated component matrix in Experiment 1.**

|                    | PC1    | PC2    |
|--------------------|--------|--------|
| Temperature: 0 °C  | 0.509  | 0.246  |
| Temperature: 10 °C | 0.508  | -0.178 |
| Temperature: 20 °C | -0.178 | -0.803 |
| Temperature: 30 °C | -0.524 | -0.070 |
| Temperature: 40 °C | -0.422 | 0.508  |

**S3 Table. Main and Interaction Relative Treatment Effects in Experiment 1**

| <b>A) Temperature: 0 °C</b> |      | English | Spanish | Japanese | Chinese |
|-----------------------------|------|---------|---------|----------|---------|
|                             |      | 0.49    | 0.48    | 0.53     | 0.51    |
| Tense, Bothered             | 0.50 | 0.45    | 0.46    | 0.57     | 0.51    |
| Jittery, Nervous            | 0.47 | 0.46    | 0.42    | 0.45     | 0.56    |
| Active, Alert               | 0.36 | 0.33    | 0.37    | 0.34     | 0.41    |
| Energetic, Excited          | 0.35 | 0.32    | 0.31    | 0.33     | 0.42    |
| Enthusiastic, Inspired      | 0.35 | 0.32    | 0.35    | 0.33     | 0.41    |
| Happy, Satisfied            | 0.37 | 0.35    | 0.35    | 0.34     | 0.43    |
| Secure, At ease             | 0.43 | 0.41    | 0.40    | 0.43     | 0.48    |
| Relaxed, Calm               | 0.50 | 0.52    | 0.47    | 0.43     | 0.57    |
| Passive, Quiet              | 0.66 | 0.64    | 0.55    | 0.78     | 0.66    |
| Dull, Bored                 | 0.66 | 0.69    | 0.64    | 0.66     | 0.64    |
| Blue, Uninspired            | 0.74 | 0.77    | 0.75    | 0.73     | 0.70    |
| Unhappy, Dissatisfied       | 0.65 | 0.68    | 0.65    | 0.70     | 0.57    |

  

| <b>B) Temperature: 10 °C</b> |      | English | Spanish | Japanese | Chinese |
|------------------------------|------|---------|---------|----------|---------|
|                              |      | 0.47    | 0.48    | 0.56     | 0.53    |
| Tense, Bothered              | 0.44 | 0.34    | 0.36    | 0.57     | 0.49    |
| Jittery, Nervous             | 0.43 | 0.38    | 0.38    | 0.45     | 0.52    |
| Active, Alert                | 0.41 | 0.33    | 0.44    | 0.40     | 0.47    |
| Energetic, Excited           | 0.36 | 0.31    | 0.37    | 0.33     | 0.44    |
| Enthusiastic, Inspired       | 0.37 | 0.32    | 0.38    | 0.33     | 0.46    |
| Happy, Satisfied             | 0.45 | 0.38    | 0.45    | 0.44     | 0.52    |
| Secure, At ease              | 0.52 | 0.46    | 0.48    | 0.57     | 0.58    |
| Relaxed, Calm                | 0.59 | 0.57    | 0.59    | 0.56     | 0.65    |
| Passive, Quiet               | 0.67 | 0.66    | 0.59    | 0.74     | 0.69    |
| Dull, Bored                  | 0.63 | 0.66    | 0.58    | 0.67     | 0.60    |
| Blue, Uninspired             | 0.67 | 0.68    | 0.66    | 0.67     | 0.69    |
| Unhappy, Dissatisfied        | 0.55 | 0.53    | 0.51    | 0.63     | 0.54    |

| <b>C) Temperature: 20 °C</b> |      | English | Spanish | Japanese | Chinese |
|------------------------------|------|---------|---------|----------|---------|
|                              |      | 0.45    | 0.52    | 0.57     | 0.50    |
| Tense, Bothered              | 0.37 | 0.30    | 0.36    | 0.37     | 0.44    |
| Jittery, Nervous             | 0.37 | 0.34    | 0.39    | 0.34     | 0.40    |
| Active, Alert                | 0.60 | 0.50    | 0.60    | 0.63     | 0.65    |
| Energetic, Excited           | 0.54 | 0.44    | 0.56    | 0.51     | 0.64    |
| Enthusiastic, Inspired       | 0.55 | 0.48    | 0.62    | 0.48     | 0.63    |
| Happy, Satisfied             | 0.67 | 0.60    | 0.70    | 0.68     | 0.70    |
| Secure, At ease              | 0.71 | 0.62    | 0.70    | 0.73     | 0.78    |
| Relaxed, Calm                | 0.69 | 0.61    | 0.70    | 0.72     | 0.75    |
| Passive, Quiet               | 0.52 | 0.49    | 0.60    | 0.42     | 0.57    |
| Dull, Bored                  | 0.41 | 0.40    | 0.35    | 0.43     | 0.44    |
| Blue, Uninspired             | 0.37 | 0.35    | 0.33    | 0.37     | 0.43    |
| Unhappy, Dissatisfied        | 0.34 | 0.31    | 0.31    | 0.31     | 0.42    |

| <b>D) Temperature: 30 °C</b> |      | English | Spanish | Japanese | Chinese |
|------------------------------|------|---------|---------|----------|---------|
|                              |      | 0.48    | 0.53    | 0.52     | 0.49    |
| Tense, Bothered              | 0.53 | 0.53    | 0.59    | 0.50     | 0.51    |
| Jittery, Nervous             | 0.55 | 0.51    | 0.60    | 0.62     | 0.49    |
| Active, Alert                | 0.65 | 0.63    | 0.66    | 0.62     | 0.68    |
| Energetic, Excited           | 0.69 | 0.68    | 0.72    | 0.69     | 0.68    |
| Enthusiastic, Inspired       | 0.65 | 0.66    | 0.61    | 0.68     | 0.66    |
| Happy, Satisfied             | 0.63 | 0.65    | 0.65    | 0.56     | 0.64    |
| Secure, At ease              | 0.51 | 0.53    | 0.59    | 0.41     | 0.51    |
| Relaxed, Calm                | 0.46 | 0.44    | 0.50    | 0.41     | 0.49    |
| Passive, Quiet               | 0.34 | 0.30    | 0.39    | 0.28     | 0.37    |
| Dull, Bored                  | 0.35 | 0.28    | 0.37    | 0.34     | 0.39    |
| Blue, Uninspired             | 0.28 | 0.23    | 0.27    | 0.31     | 0.32    |
| Unhappy, Dissatisfied        | 0.39 | 0.34    | 0.36    | 0.42     | 0.45    |

| <b>E) Temperature: 40 °C</b> |      | English | Spanish | Japanese | Chinese |
|------------------------------|------|---------|---------|----------|---------|
|                              |      | 0.51    | 0.50    | 0.48     | 0.49    |
| Tense, Bothered              | 0.63 | 0.69    | 0.71    | 0.55     | 0.57    |
| Jittery, Nervous             | 0.62 | 0.61    | 0.64    | 0.73     | 0.52    |
| Active, Alert                | 0.59 | 0.65    | 0.58    | 0.56     | 0.58    |
| Energetic, Excited           | 0.65 | 0.71    | 0.62    | 0.68     | 0.60    |
| Enthusiastic, Inspired       | 0.62 | 0.65    | 0.54    | 0.70     | 0.60    |
| Happy, Satisfied             | 0.51 | 0.53    | 0.50    | 0.46     | 0.53    |
| Secure, At ease              | 0.38 | 0.43    | 0.40    | 0.30     | 0.39    |
| Relaxed, Calm                | 0.34 | 0.35    | 0.37    | 0.31     | 0.35    |
| Passive, Quiet               | 0.35 | 0.34    | 0.35    | 0.34     | 0.38    |
| Dull, Bored                  | 0.40 | 0.35    | 0.45    | 0.35     | 0.44    |
| Blue, Uninspired             | 0.36 | 0.33    | 0.36    | 0.38     | 0.37    |
| Unhappy, Dissatisfied        | 0.51 | 0.48    | 0.50    | 0.57     | 0.50    |

Relative treatment effects (RTEs) indicate the tendency of participants to have higher (or lower) ratings of associations between an emotion and a given temperature compared to all the participants' ratings for the other emotions. RTEs range from 0 to 1. Larger differences between RTEs indicate larger differences in association ratings.
